# Supplementary figures and images for: CYP-450 Mediated Herb-Drug Interactions of Ashwagandha and AYUSH-64 Used in COVID-19 Integrative Management: A Case Example of Remdesivir
Source: Research Square preprint supplement (doi:10.21203/rs.3.rs-1201240/v1), 2021-12-29

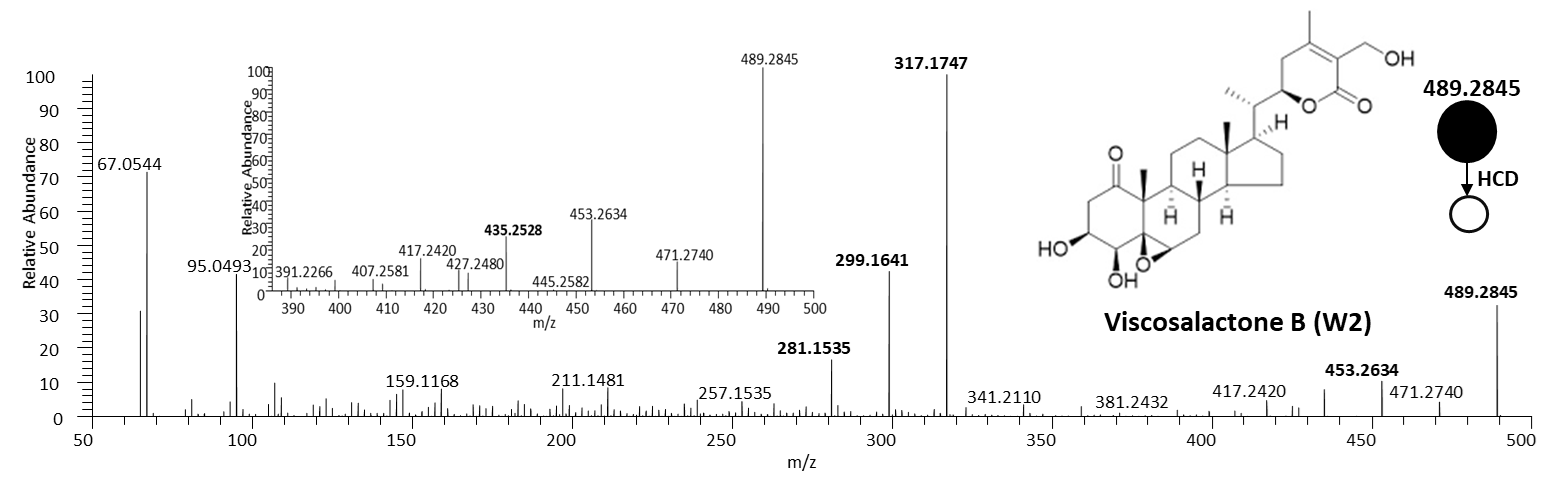

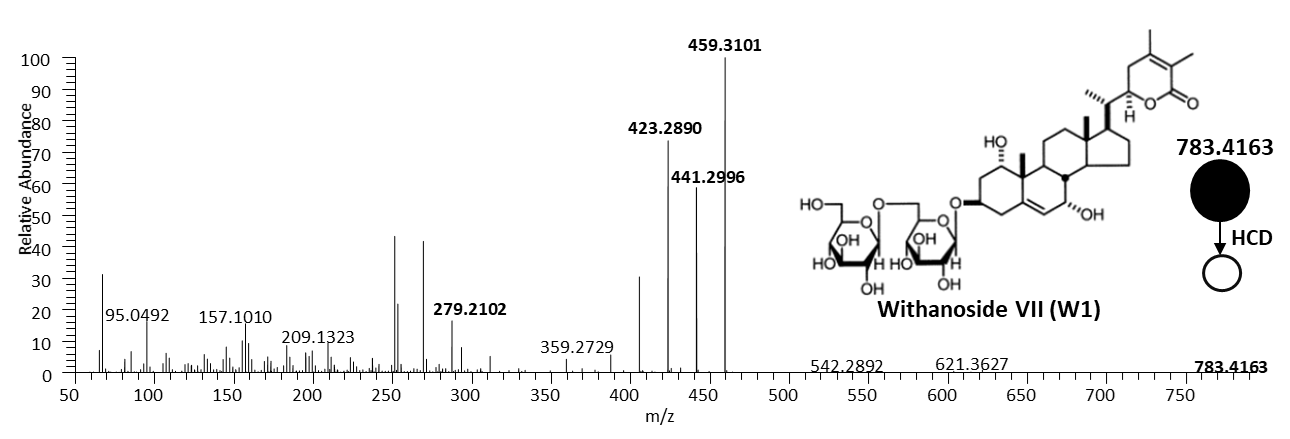


**Supplementary Data (MS/MS spectra of phytoconstituents identified from *Withania somnifera*)**


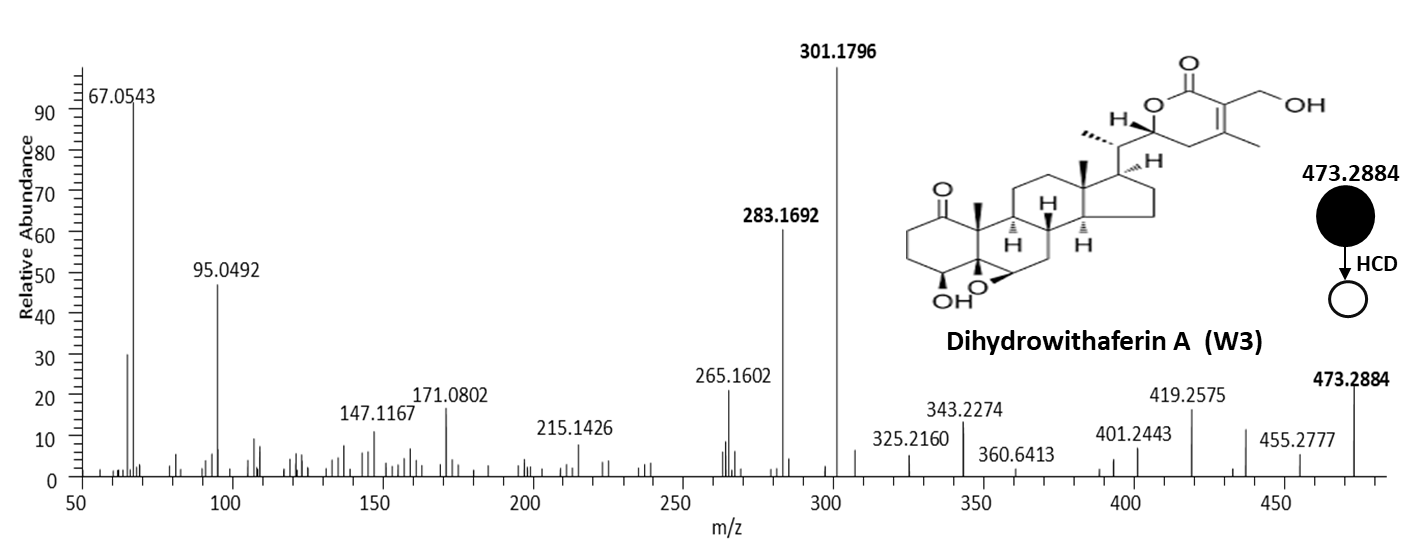


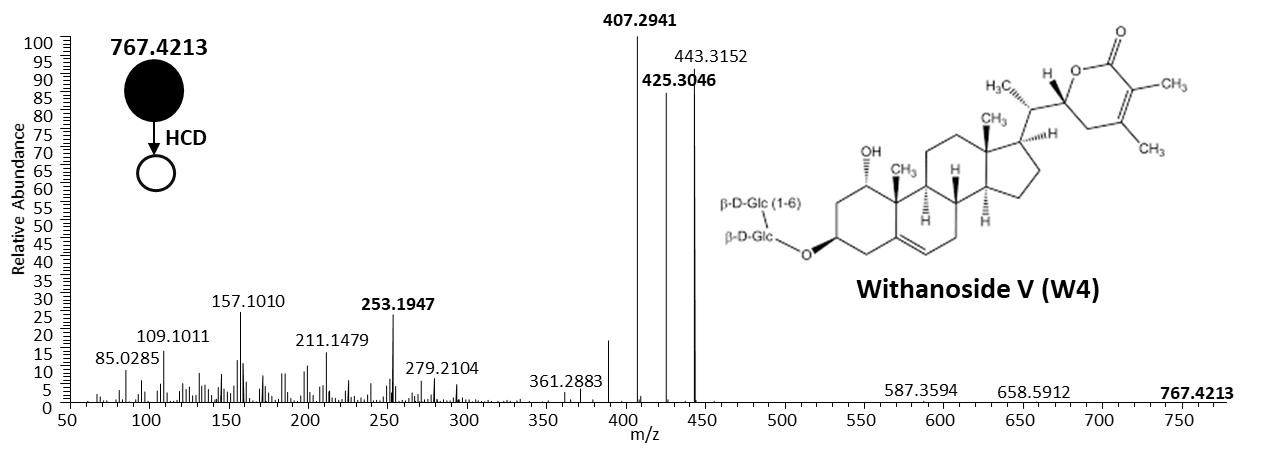


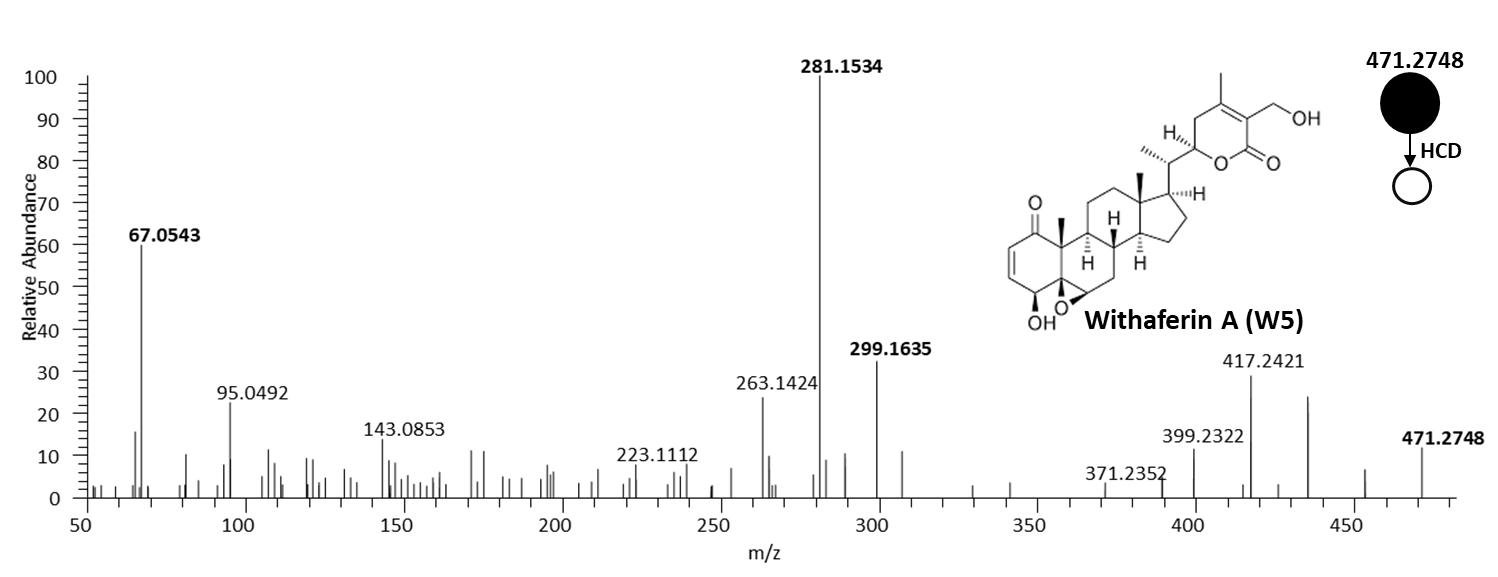


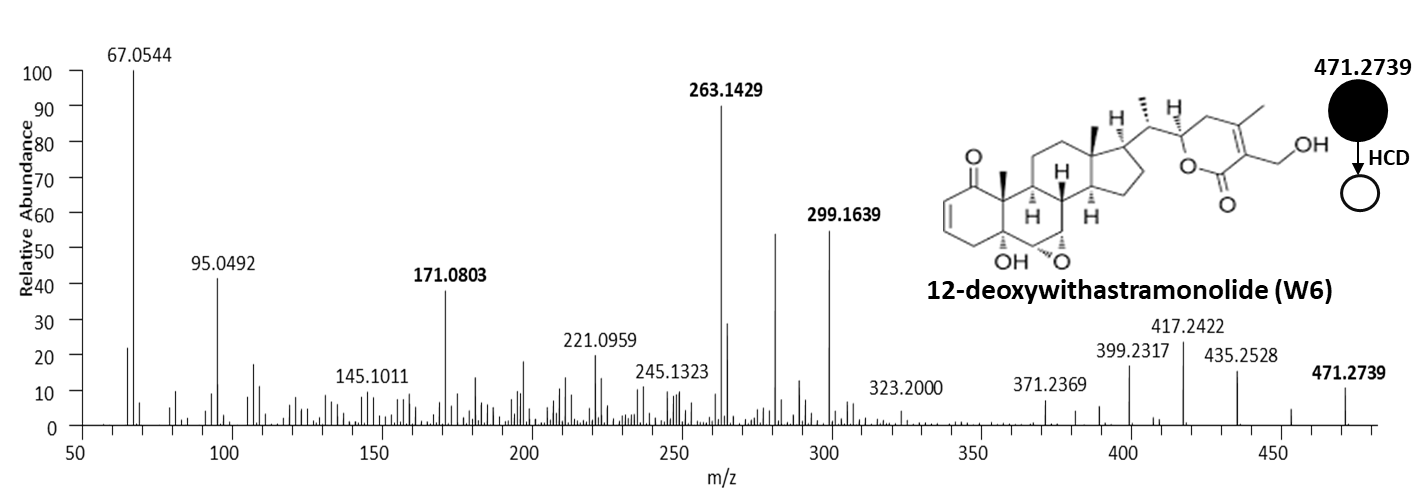


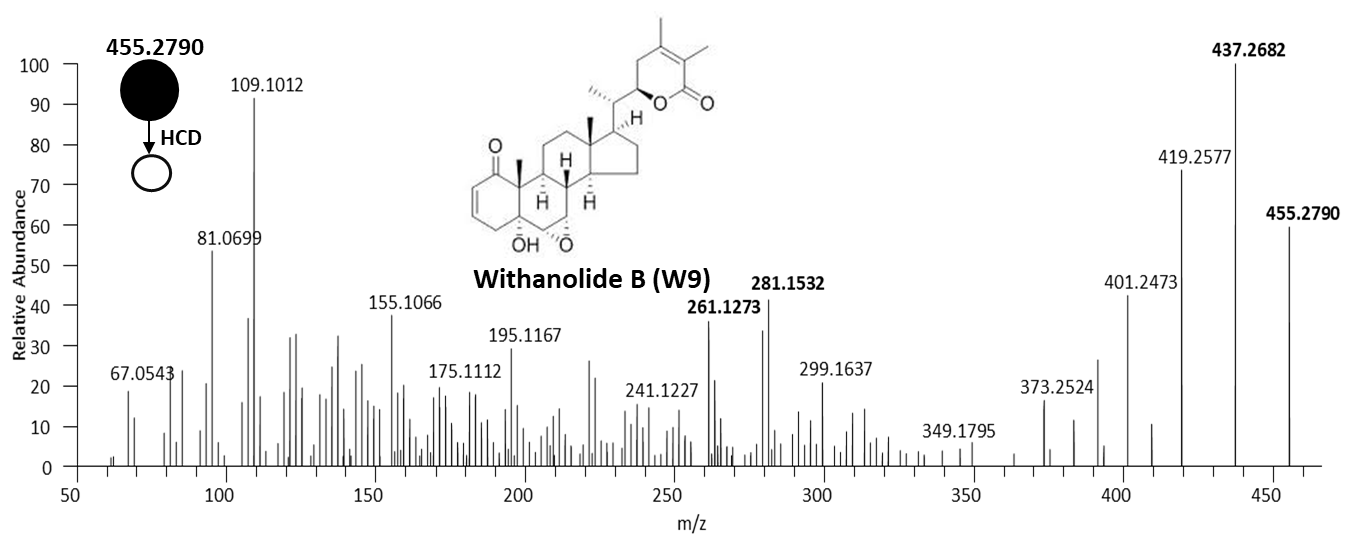

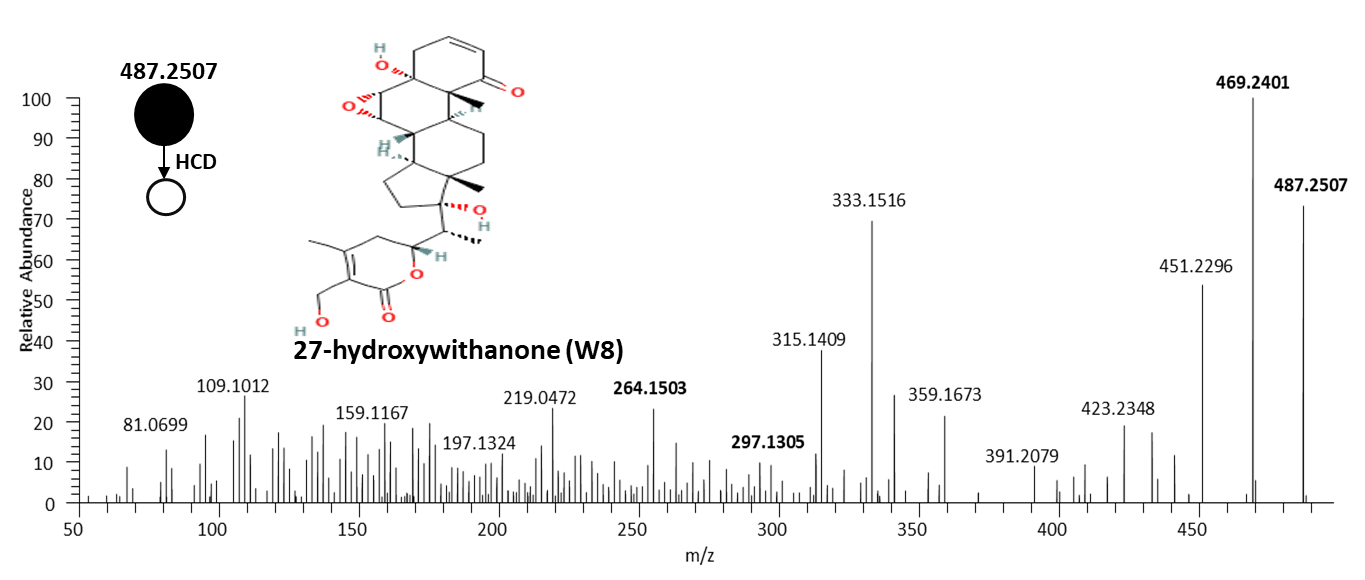

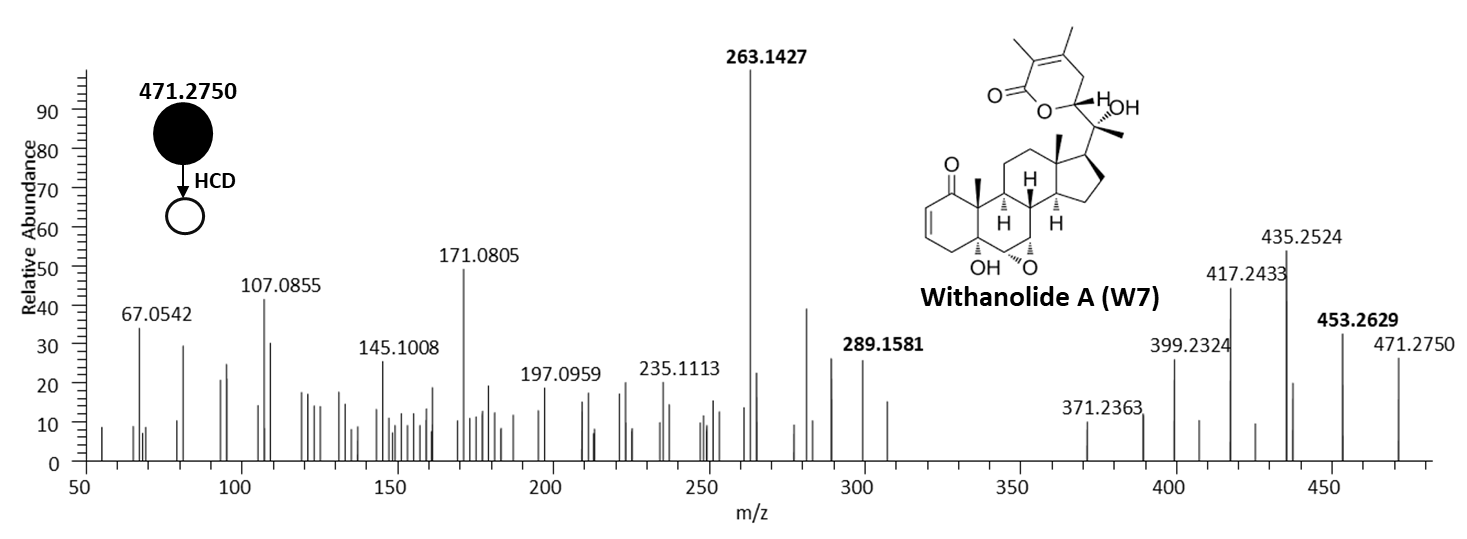


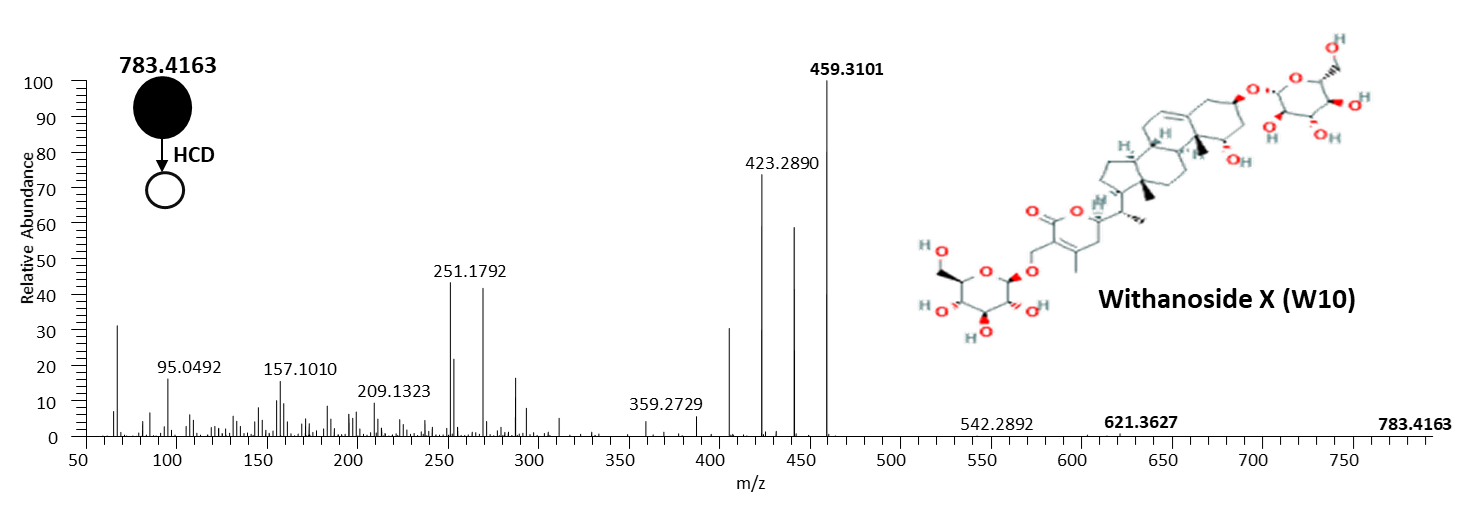


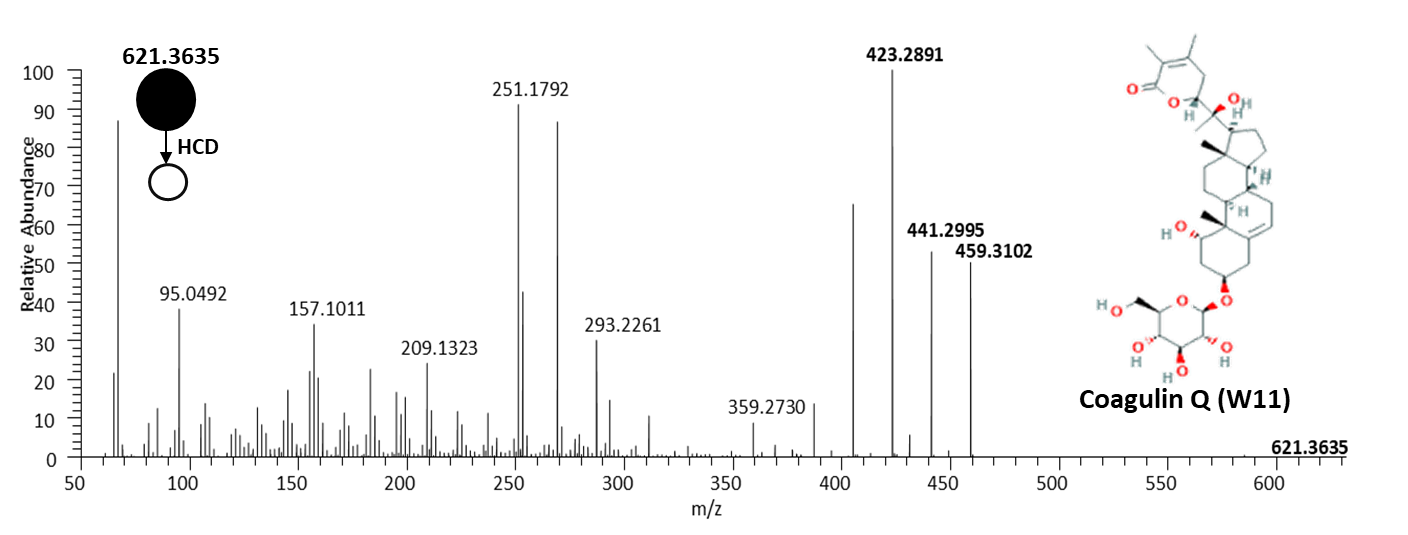

Supplement: Supplementary file 1 [file 2fdd6d0d0d2e2b29de9176c4.docx]
